# Supplementary material for: Thermal luminescence quenching of amine-functionalized silicon quantum dots: a pH and wavelength-dependent study
Source: Royal Society of Chemistry journal article supplement (doi:10.1039/c5cp04483a), 2015-01-01

## Supporting Information

# Thermal luminescence quenching of amine- functionalized silicon quantum dots: A pH and wavelength-dependent study

**Surajit Chatterjee and Tushar Kanti Mukherjee\***

Discipline of Chemistry, Indian Institute of Technology Indore, M-Block, IET-DAVV Campus,  
Khandwa Road, Indore-452017, M.P., India.

---

\* **Corresponding Author**

E-mail: [tusharm@iiti.ac.in](mailto:tusharm@iiti.ac.in). Tel: +91-731-2438738.

**Figure S1.** Changes in PL intensity for the heating and cooling processes in the second cycle at (a) pH 3.5 and (b) pH 7.4 with  $\lambda_{\text{ex}}$  375 nm and at (c) pH 3.5 and (d) pH 7.4 with  $\lambda_{\text{ex}}$  460 nm.

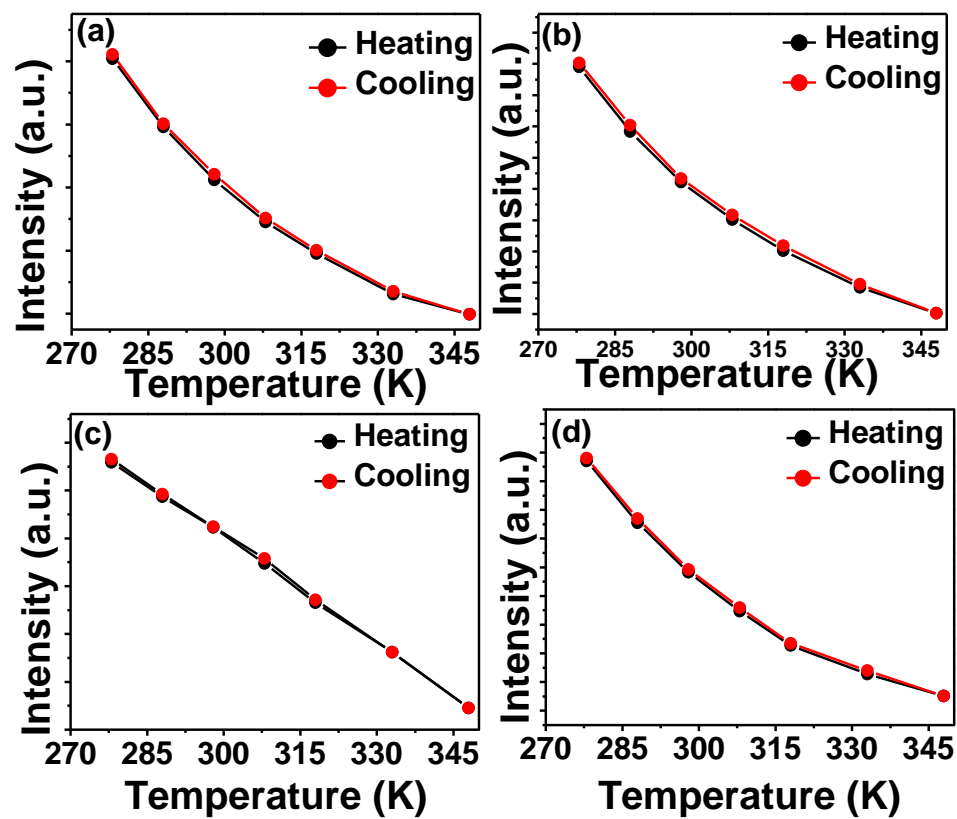

**Figure S2.** PL decay traces of Si QD at 278 K before (black) and after (red) heating in pH 3.5 solution.

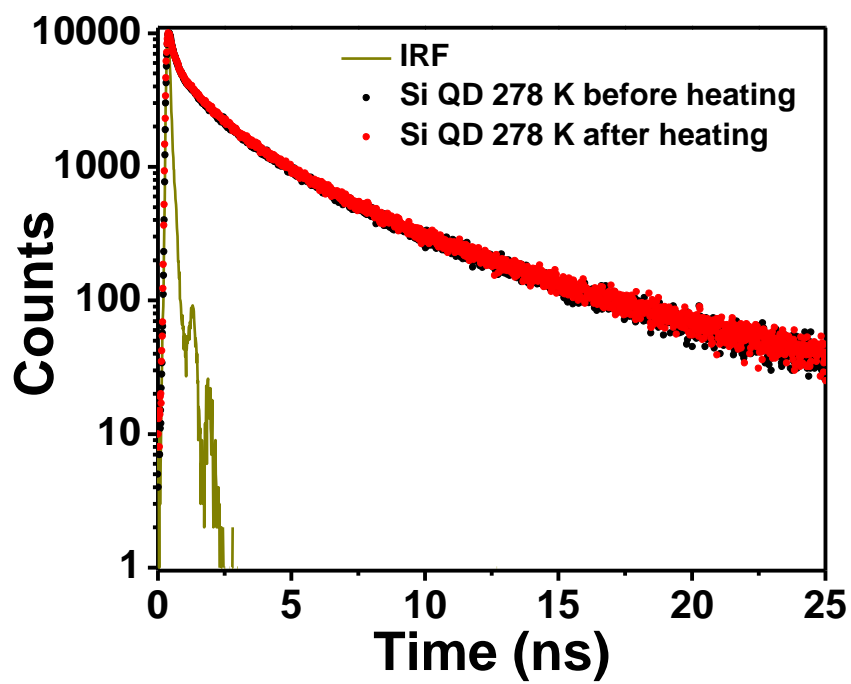

Supplement: c5cp04483a1.pdf [file c5cp04483a1.pdf]
